# Supplementary material for: Molecular dynamics simulation elucidates the preferential binding affinity of sodium and tetramethylammonium ions for tetrameric Nafion unit under aqueous conditions
Source: Royal Society of Chemistry journal article supplement (doi:10.1039/c6ra21845h), 2016-01-01
Supplement: c6ra21845h1.pdf [file c6ra21845h1.pdf]

**SUPPORTING INFORMATION**

for

**Molecular Dynamics Simulation Elucidates the Preferential Binding Affinity of Sodium  
and Tetramethylammonium Ions for Tetrameric Nafion Unit under Aqueous  
Conditions**

Soumadwip Ghosh, Rajarshi Chakrabarti\*

*Department of Chemistry, Indian Institute of Technology Bombay, Powai, Mumbai – 400076, India.*

**AUTHOR INFORMATION**

\*Corresponding author

Mailing Address: IIT Bombay, Department of Chemistry, Room 215, Powai, Mumbai-400076, India

Email:                    [rajarshi@chem.iitb.ac.in](mailto:rajarshi@chem.iitb.ac.in)

Phone:                    + 91-022-2576 7192

Fax :                      + 91-022-2576 7152

| Atom Serial Number | Atom Type | Partial Charge |
|--------------------|-----------|----------------|
| 1                  | C         | 1.378066       |
| 2                  | C         | -0.647428      |
| 3                  | C         | 0.875498       |
| 4                  | C         | 0.238220       |
| 5                  | C         | 0.654350       |
| 6                  | C         | 0.567950       |
| 7                  | C         | 0.431645       |
| 8                  | C         | 0.414311       |
| 9                  | C         | 0.467674       |
| 10                 | C         | 0.593316       |
| 11                 | C         | 0.484354       |
| 12                 | C         | 0.174233       |
| 13                 | C         | 0.514580       |
| 14                 | C         | -0.154549      |
| 15                 | C         | 1.150666       |
| 16                 | C         | 0.626701       |
| 17                 | F         | -0.188154      |
| 18                 | F         | -0.268534      |
| 19                 | F         | -0.201048      |
| 20                 | F         | -0.088510      |
| 21                 | F         | -0.241007      |
| 22                 | F         | -0.255251      |
| 23                 | F         | -0.250284      |
| 24                 | F         | -0.228394      |
| 25                 | F         | -0.244299      |
| 26                 | F         | -0.251795      |
| 27                 | F         | -0.249718      |
| 28                 | F         | -0.246189      |
| 29                 | F         | -0.245072      |
| 30                 | F         | -0.247093      |
| 31                 | F         | -0.249640      |
| 32                 | F         | -0.247027      |
| 33                 | F         | -0.240924      |
| 34                 | F         | -0.245554      |
| 35                 | F         | -0.252087      |
| 36                 | F         | -0.244259      |
| 37                 | F         | -0.249612      |
| 38                 | F         | -0.235861      |
| 39                 | F         | -0.224827      |
| 40                 | F         | -0.246339      |
| 41                 | F         | -0.243564      |
| 42                 | F         | -0.205165      |
| 43                 | F         | -0.115698      |
| 44                 | F         | -0.246480      |
| 45                 | F         | -0.241871      |
| 46                 | F         | -0.264383      |
| 47                 | F         | -0.272916      |
| 48                 | C         | 0.886318       |
| 49                 | O         | -0.125358      |
| 50                 | F         | -0.355097      |
| 51                 | F         | -0.327390      |
| 52                 | F         | -0.223299      |
| 53                 | C         | 0.255678       |
| 54                 | C         | -0.506639      |

|     |   |           |
|-----|---|-----------|
| 55  | C | 0.502636  |
| 56  | O | -0.363030 |
| 57  | O | -0.680195 |
| 58  | O | -0.597246 |
| 59  | F | -0.224103 |
| 60  | F | -0.237333 |
| 61  | F | -0.078114 |
| 62  | F | 0.113239  |
| 63  | O | -0.622269 |
| 64  | S | 1.454415  |
| 65  | C | 1.163358  |
| 66  | C | 0.509542  |
| 67  | C | 0.579434  |
| 68  | C | 0.276929  |
| 69  | C | 0.226031  |
| 70  | C | 0.458194  |
| 71  | C | 0.619062  |
| 72  | C | 0.591311  |
| 73  | C | 0.250517  |
| 74  | C | 0.518002  |
| 75  | C | 0.747664  |
| 76  | C | -0.055407 |
| 77  | C | 0.796310  |
| 78  | C | -0.142876 |
| 79  | C | 1.298093  |
| 80  | C | 0.175741  |
| 81  | F | -0.270338 |
| 82  | F | -0.270656 |
| 83  | F | -0.293075 |
| 84  | F | -0.253273 |
| 85  | F | -0.255275 |
| 86  | F | -0.251069 |
| 87  | F | -0.248665 |
| 88  | F | -0.243646 |
| 89  | F | -0.245834 |
| 90  | F | -0.245977 |
| 91  | F | -0.244572 |
| 92  | F | -0.246153 |
| 93  | F | -0.244849 |
| 94  | F | -0.250757 |
| 95  | F | -0.248492 |
| 96  | F | -0.248753 |
| 97  | F | -0.244829 |
| 98  | F | -0.245876 |
| 99  | F | -0.245658 |
| 100 | F | -0.247359 |
| 101 | F | -0.243202 |
| 102 | F | -0.254236 |
| 103 | F | -0.251799 |
| 104 | F | -0.215788 |
| 105 | F | -0.229133 |
| 106 | F | -0.252570 |
| 107 | F | -0.250647 |
| 108 | F | -0.172969 |
| 109 | F | -0.216605 |

|     |   |           |
|-----|---|-----------|
| 110 | F | -0.242963 |
| 111 | F | -0.268704 |
| 112 | F | -0.245001 |
| 113 | C | 0.943717  |
| 114 | O | -0.084747 |
| 115 | F | -0.243272 |
| 116 | F | -0.251188 |
| 117 | F | -0.196343 |
| 118 | C | -0.554301 |
| 119 | C | 0.036908  |
| 120 | C | 0.843658  |
| 121 | O | -0.111467 |
| 122 | O | -0.704170 |
| 123 | O | -0.640685 |
| 124 | F | -0.238798 |
| 125 | F | -0.244774 |
| 126 | F | -0.207195 |
| 127 | F | -0.207552 |
| 128 | O | -0.609787 |
| 129 | S | 1.402594  |
| 130 | C | 1.250378  |
| 131 | C | -0.487423 |
| 132 | C | 0.946712  |
| 133 | C | 0.140338  |
| 134 | C | 0.515593  |
| 135 | C | 0.549556  |
| 136 | C | 0.462884  |
| 137 | C | 0.492823  |
| 138 | C | 0.373033  |
| 139 | C | 0.567656  |
| 140 | C | 0.582775  |
| 141 | C | 0.233763  |
| 142 | C | 0.649950  |
| 143 | C | -0.169988 |
| 144 | C | 1.251812  |
| 145 | C | 0.510477  |
| 146 | F | -0.195942 |
| 147 | F | -0.275177 |
| 148 | F | -0.199661 |
| 149 | F | -0.092878 |
| 150 | F | -0.244226 |
| 151 | F | -0.255965 |
| 152 | F | -0.247140 |
| 153 | F | -0.230384 |
| 154 | F | -0.245582 |
| 155 | F | -0.250783 |
| 156 | F | -0.247073 |
| 157 | F | -0.245934 |
| 158 | F | -0.247532 |
| 159 | F | -0.248031 |
| 160 | F | -0.247701 |
| 161 | F | -0.245266 |
| 162 | F | -0.243634 |
| 163 | F | -0.245748 |
| 164 | F | -0.248742 |

|     |   |           |
|-----|---|-----------|
| 165 | F | -0.241014 |
| 166 | F | -0.247898 |
| 167 | F | -0.246035 |
| 168 | F | -0.233135 |
| 169 | F | -0.242153 |
| 170 | F | -0.249000 |
| 171 | F | -0.245231 |
| 172 | F | -0.180232 |
| 173 | F | -0.242548 |
| 174 | F | -0.257855 |
| 175 | F | -0.262775 |
| 176 | F | -0.279946 |
| 177 | C | 0.703435  |
| 178 | O | -0.183999 |
| 179 | F | -0.280800 |
| 180 | F | -0.298019 |
| 181 | F | -0.280446 |
| 182 | C | 0.684443  |
| 183 | C | 0.226516  |
| 184 | C | 0.498131  |
| 185 | O | -0.318751 |
| 186 | O | -0.708955 |
| 187 | O | -0.623234 |
| 188 | F | -0.239508 |
| 189 | F | -0.245589 |
| 190 | F | -0.230113 |
| 191 | F | -0.262875 |
| 192 | O | -0.636769 |
| 193 | S | 1.412286  |
| 194 | C | 0.087437  |
| 195 | C | 0.220940  |
| 196 | C | 0.657856  |
| 197 | C | 0.172430  |
| 198 | C | 0.704320  |
| 199 | C | 0.338412  |
| 200 | C | 0.349393  |
| 201 | C | 0.749437  |
| 202 | C | 0.346982  |
| 203 | C | 0.383728  |
| 204 | C | 0.982228  |
| 205 | C | -0.362025 |
| 206 | C | 0.787425  |
| 207 | C | 0.057624  |
| 208 | C | 1.188645  |
| 209 | C | 0.231276  |
| 210 | F | -0.298088 |
| 211 | F | -0.304325 |
| 212 | F | -0.229884 |
| 213 | F | 0.682549  |
| 214 | F | -0.252988 |
| 215 | F | -0.229724 |
| 216 | F | -0.192182 |
| 217 | F | -0.173930 |
| 218 | F | -0.249641 |
| 219 | F | -0.251102 |

|     |   |           |
|-----|---|-----------|
| 220 | F | -0.241355 |
| 221 | F | -0.241147 |
| 222 | F | -0.246585 |
| 223 | F | -0.251881 |
| 224 | F | -0.247478 |
| 225 | F | -0.250444 |
| 226 | F | -0.252651 |
| 227 | F | -0.249796 |
| 228 | F | -0.243731 |
| 229 | F | -0.244502 |
| 230 | F | -0.254576 |
| 231 | F | -0.257171 |
| 232 | F | -0.211064 |
| 233 | F | -0.215340 |
| 234 | F | -0.258057 |
| 235 | F | -0.252136 |
| 236 | F | -0.175333 |
| 237 | F | -0.218798 |
| 238 | F | -0.252314 |
| 239 | F | -0.273673 |
| 240 | F | -0.253406 |
| 241 | C | 0.923318  |
| 242 | O | -0.076326 |
| 243 | F | -0.270131 |
| 244 | F | -0.258869 |
| 245 | F | -0.199902 |
| 246 | C | -0.270795 |
| 247 | C | 0.049752  |
| 248 | C | 0.784107  |
| 249 | O | -0.121046 |
| 250 | O | -0.683863 |
| 251 | O | -0.651359 |
| 252 | F | -0.241072 |
| 253 | F | -0.245779 |
| 254 | F | -0.227683 |
| 255 | F | -0.210843 |
| 256 | O | -0.599871 |
| 257 | S | 1.383176  |
| 258 | F | -0.335673 |
| 259 | F | -0.327052 |
| 260 | F | -0.304802 |
| 261 | F | -0.312874 |
| 262 | F | -0.274670 |

TABLE S1. Partial charges assigned to the different atoms constituting the 4-mer nafion according to its ground state geometry optimized using the B3LYP model of the Density Functional Theory (DFT) in combination with 6-311++G(d, p) basis set in the Gaussian-09 software. The cumulative sum of the total Mulliken charges listed above comes out to be -4.000.
